# Supplementary material for: Patients’ Engagement in Early Detection of COVID-19 Symptoms: An Observational Study in the Very Early Peak of the Pandemic in Italy in 2020
Source: MDPI journal article supplement (doi:10.3390/ijerph19053058), 2022-03-05
Supplement: s1 [file s1]

[illegible]

|                                               |                  |        |                  |       |                  |       |                   |        |
|-----------------------------------------------|------------------|--------|------------------|-------|------------------|-------|-------------------|--------|
| No                                            | 1.00 (Reference) |        |                  |       | 1.00 (Reference) |       | 1.00 (Reference)  |        |
| Yes                                           | 0.89 (0.63-1.25) | 0.494  |                  |       | 1.20 (0.60-2.11) | 0.719 | 0.56 (0.22-1.41)  | 0.217  |
| <b>Sleepiness during day</b>                  |                  |        |                  |       |                  |       |                   |        |
| No                                            | 1.00 (Reference) |        | 1.00 (Reference) |       | 1.00 (Reference) |       | 1.00 (Reference)  |        |
| Yes                                           | 2.28 (1.63-3.18) | <0.001 | 1.60 (1.06-2.42) | 0.026 | 1.64 (0.92-2.93) | 0.097 | 2.36 (0.98-5.70)  | 0.056  |
| <b>Confusional state</b>                      |                  |        |                  |       |                  |       |                   |        |
| No                                            | 1.00 (Reference) |        |                  |       | 1.00 (Reference) |       | 1.00 (Reference)  |        |
| Yes                                           | 2.55 (1.51-4.33) | 0.005  |                  |       | 1.75 (0.77-3.99) | 0.180 | 3.86 (0.67-22.4)  | 0.131  |
| <b>Involuntary tremors</b>                    |                  |        |                  |       |                  |       |                   |        |
| No                                            | 1.00 (Reference) |        |                  |       | 1.00 (Reference) |       | 1.00 (Reference)  |        |
| Yes                                           | 2.97 (1.64-5.36) | <0.001 |                  |       | 1.99 (0.80-4.84) | 0.139 | 21.4 (2.57-178.0) | <0.001 |
| <b>Tingling in the limbs/face</b>             |                  |        |                  |       |                  |       |                   |        |
| No                                            | 1.00 (Reference) |        |                  |       | 1.00 (Reference) |       | 1.00 (Reference)  |        |
| Yes                                           | 1.15 (0.74-1.18) | 0.5280 |                  |       | 1.17 (0.57-2.43) | 0.671 | 1.92 (0.73-5.62)  | 0.185  |
| <b>Number of overall symptoms<sup>2</sup></b> |                  |        |                  |       |                  |       |                   |        |
| 1                                             | 1.00 (Reference) |        |                  |       | 1.00 (Reference) |       | 1.00 (Reference)  |        |
| 2                                             | 2.82 (1.58-5.04) | <0.001 |                  |       | 1.52 (0.53-4.34) | 0.435 | 2.00 (0.39-10.2)  | 0.403  |
| 3                                             | 7.35 (4.06-13.3) | <0.001 |                  |       | 3.30 (1.26-8.64) | 0.015 | 7.00 (1.45-33.7)  | 0.015  |
| ≥4                                            | 15.0 (8.83-25.5) | <0.001 |                  |       | 5.44 (1.89-15.6) | 0.002 | 15.2 (3.68-63.1)  | <0.001 |

OR =Odds ratio represent the probability of calling the GP over probability of not calling the GP

<sup>1</sup> In the table are reported only the statistically significant variables implemented in the multivariate model

<sup>2</sup> Not evaluated in multivariate analyses due to multicollinearity issues
